# Supplementary material
Source: HighWire-hosted journal article supplement (https://bmjopenquality.bmj.com/content/12/4/e002311)
Supplement: inline-supplementary-material-1 [file inline-supplementary-material-1.pdf]

Ovid

Database(s): EBM Reviews - Cochrane Central Register of Controlled Trials May 2021, EBM Reviews - Cochrane Database of Systematic Reviews 2005 to June 16, 2021, Embase 1974 to 2021 June 22 , Ovid MEDLINE(R) and Epub Ahead of Print, In-Process, In-Data-Review & Other Non-Indexed Citations and Daily 1946 to June 22, 2021

Search Strategy:

| #  | Searches                                                                                                                                                                                                                                                                                                                                                                                                                                                                                                                                                                                                                                                                                                                                                                                                                                                                        | Results  |
|----|---------------------------------------------------------------------------------------------------------------------------------------------------------------------------------------------------------------------------------------------------------------------------------------------------------------------------------------------------------------------------------------------------------------------------------------------------------------------------------------------------------------------------------------------------------------------------------------------------------------------------------------------------------------------------------------------------------------------------------------------------------------------------------------------------------------------------------------------------------------------------------|----------|
| 1  | ("ambulatory visit" or "ambulatory visits" or appointment* or consultation or consultations or encounter or encounters or "Office visit" or "office visits" or "outpatient visit" or "outpatient visits") adj5 (duration or interval* or length or lengthen or lengths or longer or minutes or shorte* or time or times).ti,ab,kw.                                                                                                                                                                                                                                                                                                                                                                                                                                                                                                                                              | 29010    |
| 2  | exp Physicians/                                                                                                                                                                                                                                                                                                                                                                                                                                                                                                                                                                                                                                                                                                                                                                                                                                                                 | 966050   |
| 3  | Primary Health Care/                                                                                                                                                                                                                                                                                                                                                                                                                                                                                                                                                                                                                                                                                                                                                                                                                                                            | 156358   |
| 4  | general practice/                                                                                                                                                                                                                                                                                                                                                                                                                                                                                                                                                                                                                                                                                                                                                                                                                                                               | 94059    |
| 5  | family practice/                                                                                                                                                                                                                                                                                                                                                                                                                                                                                                                                                                                                                                                                                                                                                                                                                                                                | 144270   |
| 6  | (Allergist* or Anaesthesiologist* or Andrologist* or Anesthesiologist* or cardiologist* or clinician* or dermatologist* or doctor* or endocrinologist* or "family practice" or feldsher* or gastroenterologist* or gastrologist* or "general practice" or Geneticist* or geriatrician* or gerontologist* or Gynecologist* or Hematologist* or Hepatologist* or hospitalist* or Immunologist* or Internist* or "local health authority" or nephrologist* or neurologist* or Neurophysiologist* or neurosurgeon* or obstetrician* or oncologist* or Ophthalmologist* or Orthopedist* or otolaryngologist* or physician* or Physiologist* or podiatrist* or practitioner* or "primary care" or "primary health care" or provider* or Psychiatrist* or Pulmonologist* or radiologist* or rheumatologist* or Specialist* or surgeon* or "surgical special*" or urologist*).ti,ab,kw. | 3956678  |
| 7  | or/2-6                                                                                                                                                                                                                                                                                                                                                                                                                                                                                                                                                                                                                                                                                                                                                                                                                                                                          | 4288564  |
| 8  | 1 and 7                                                                                                                                                                                                                                                                                                                                                                                                                                                                                                                                                                                                                                                                                                                                                                                                                                                                         | 17107    |
| 9  | exp Patient Safety/                                                                                                                                                                                                                                                                                                                                                                                                                                                                                                                                                                                                                                                                                                                                                                                                                                                             | 160095   |
| 10 | "Quality of Health Care"/                                                                                                                                                                                                                                                                                                                                                                                                                                                                                                                                                                                                                                                                                                                                                                                                                                                       | 281199   |
| 11 | Quality Indicators, Health Care/                                                                                                                                                                                                                                                                                                                                                                                                                                                                                                                                                                                                                                                                                                                                                                                                                                                | 209468   |
| 12 | exp Quality Assurance, Health Care/                                                                                                                                                                                                                                                                                                                                                                                                                                                                                                                                                                                                                                                                                                                                                                                                                                             | 3816522  |
| 13 | exp Health Equity/                                                                                                                                                                                                                                                                                                                                                                                                                                                                                                                                                                                                                                                                                                                                                                                                                                                              | 6627     |
| 14 | exp Healthcare Disparities/ or exp Health Status Disparities/                                                                                                                                                                                                                                                                                                                                                                                                                                                                                                                                                                                                                                                                                                                                                                                                                   | 74047    |
| 15 | exp Patient Satisfaction/                                                                                                                                                                                                                                                                                                                                                                                                                                                                                                                                                                                                                                                                                                                                                                                                                                                       | 253810   |
| 16 | ((patient or patients) adj3 (safety or error* or "adverse event*" or experience* or enabl*)) or (patient* adj3 satisf*) or (quality adj5 (care or healthcare)) or confidence or Disparit* or effectiveness or efficiency or equit* or inequit* or "patient-centeredness" or safety or timeliness or trust or value).ti,ab,kw.                                                                                                                                                                                                                                                                                                                                                                                                                                                                                                                                                   | 8140296  |
| 17 | or/9-16                                                                                                                                                                                                                                                                                                                                                                                                                                                                                                                                                                                                                                                                                                                                                                                                                                                                         | 11154331 |
| 18 | 8 and 17                                                                                                                                                                                                                                                                                                                                                                                                                                                                                                                                                                                                                                                                                                                                                                                                                                                                        | 9720     |

|    |                                                                                                                                                                                                                                                                                                                                         |         |
|----|-----------------------------------------------------------------------------------------------------------------------------------------------------------------------------------------------------------------------------------------------------------------------------------------------------------------------------------------|---------|
| 19 | limit 18 to ("all adult (19 plus years)" or "young adult (19 to 24 years)" or "adult (19 to 44 years)" or "young adult and adult (19-24 and 19-44)" or "middle age (45 to 64 years)" or "middle aged (45 plus years)" or "all aged (65 and over)" or "aged (80 and over)") [Limit not valid in CCTR,CDSR,Embase; records were retained] | 8242    |
| 20 | limit 19 to (adult <18 to 64 years> or aged <65+ years>) [Limit not valid in CCTR,CDSR,Ovid MEDLINE(R),Ovid MEDLINE(R) Daily Update,Ovid MEDLINE(R) PubMed not MEDLINE,Ovid MEDLINE(R) In-Process,Ovid MEDLINE(R) Publisher; records were retained]                                                                                     | 5414    |
| 21 | limit 18 to ("all infant (birth to 23 months)" or "all child (0 to 18 years)" or "newborn infant (birth to 1 month)" or "infant (1 to 23 months)" or "preschool child (2 to 5 years)" or "child (6 to 12 years)" or "adolescent (13 to 18 years)") [Limit not valid in CCTR,CDSR,Embase; records were retained]                         | 7417    |
| 22 | limit 21 to (embryo or infant or child or preschool child <1 to 6 years> or school child <7 to 12 years> or adolescent <13 to 17 years>) [Limit not valid in CCTR,CDSR,Ovid MEDLINE(R),Ovid MEDLINE(R) Daily Update,Ovid MEDLINE(R) PubMed not MEDLINE,Ovid MEDLINE(R) In-Process,Ovid MEDLINE(R) Publisher; records were retained]     | 2000    |
| 23 | 22 not 20                                                                                                                                                                                                                                                                                                                               | 517     |
| 24 | 18 not 23                                                                                                                                                                                                                                                                                                                               | 9203    |
| 25 | exp meta analysis/                                                                                                                                                                                                                                                                                                                      | 354853  |
| 26 | exp Meta-Analysis as Topic/                                                                                                                                                                                                                                                                                                             | 68628   |
| 27 | exp "systematic review"/                                                                                                                                                                                                                                                                                                                | 460472  |
| 28 | exp controlled study/                                                                                                                                                                                                                                                                                                                   | 8405983 |
| 29 | exp Randomized Controlled Trial/                                                                                                                                                                                                                                                                                                        | 1200088 |
| 30 | "Randomised controlled trials".sd.                                                                                                                                                                                                                                                                                                      | 241062  |
| 31 | exp triple blind procedure/                                                                                                                                                                                                                                                                                                             | 291     |
| 32 | exp Double-Blind Method/                                                                                                                                                                                                                                                                                                                | 492561  |
| 33 | exp Single-Blind Method/                                                                                                                                                                                                                                                                                                                | 95245   |
| 34 | exp latin square design/                                                                                                                                                                                                                                                                                                                | 391     |
| 35 | exp Placebos/                                                                                                                                                                                                                                                                                                                           | 430797  |
| 36 | exp Placebo Effect/                                                                                                                                                                                                                                                                                                                     | 13145   |
| 37 | exp comparative study/                                                                                                                                                                                                                                                                                                                  | 3377314 |
| 38 | exp intervention studies/                                                                                                                                                                                                                                                                                                               | 50864   |
| 39 | exp Cross-Sectional Studies/                                                                                                                                                                                                                                                                                                            | 795537  |
| 40 | exp Cohort Studies/                                                                                                                                                                                                                                                                                                                     | 3034259 |
| 41 | exp longitudinal study/                                                                                                                                                                                                                                                                                                                 | 449334  |
| 42 | exp retrospective study/                                                                                                                                                                                                                                                                                                                | 2013832 |
| 43 | exp prospective study/                                                                                                                                                                                                                                                                                                                  | 1369717 |
| 44 | exp observational study/                                                                                                                                                                                                                                                                                                                | 339044  |
| 45 | exp clinical trial/                                                                                                                                                                                                                                                                                                                     | 2502641 |

|                                                                                                                                                                                                                                                                                                                                                                                                                                                                                                                                                                                                                                                                                                                                                                                                                                                                                                                                                                                                                                                                                                                                                                                                                                                                           |          |
|---------------------------------------------------------------------------------------------------------------------------------------------------------------------------------------------------------------------------------------------------------------------------------------------------------------------------------------------------------------------------------------------------------------------------------------------------------------------------------------------------------------------------------------------------------------------------------------------------------------------------------------------------------------------------------------------------------------------------------------------------------------------------------------------------------------------------------------------------------------------------------------------------------------------------------------------------------------------------------------------------------------------------------------------------------------------------------------------------------------------------------------------------------------------------------------------------------------------------------------------------------------------------|----------|
| 46 clinical study/                                                                                                                                                                                                                                                                                                                                                                                                                                                                                                                                                                                                                                                                                                                                                                                                                                                                                                                                                                                                                                                                                                                                                                                                                                                        | 159738   |
| 47 exp Evaluation Studies/                                                                                                                                                                                                                                                                                                                                                                                                                                                                                                                                                                                                                                                                                                                                                                                                                                                                                                                                                                                                                                                                                                                                                                                                                                                | 334402   |
| 48 exp Evaluation Studies as Topic/                                                                                                                                                                                                                                                                                                                                                                                                                                                                                                                                                                                                                                                                                                                                                                                                                                                                                                                                                                                                                                                                                                                                                                                                                                       | 1275924  |
| 49 exp quantitative study/                                                                                                                                                                                                                                                                                                                                                                                                                                                                                                                                                                                                                                                                                                                                                                                                                                                                                                                                                                                                                                                                                                                                                                                                                                                | 39398    |
| 50 exp validation studies/                                                                                                                                                                                                                                                                                                                                                                                                                                                                                                                                                                                                                                                                                                                                                                                                                                                                                                                                                                                                                                                                                                                                                                                                                                                | 196224   |
| 51 exp Pilot Projects/                                                                                                                                                                                                                                                                                                                                                                                                                                                                                                                                                                                                                                                                                                                                                                                                                                                                                                                                                                                                                                                                                                                                                                                                                                                    | 321181   |
| 52 exp pilot study/                                                                                                                                                                                                                                                                                                                                                                                                                                                                                                                                                                                                                                                                                                                                                                                                                                                                                                                                                                                                                                                                                                                                                                                                                                                       | 321181   |
| 53 exp Feasibility Studies/                                                                                                                                                                                                                                                                                                                                                                                                                                                                                                                                                                                                                                                                                                                                                                                                                                                                                                                                                                                                                                                                                                                                                                                                                                               | 229535   |
| 54 exp correlational study/                                                                                                                                                                                                                                                                                                                                                                                                                                                                                                                                                                                                                                                                                                                                                                                                                                                                                                                                                                                                                                                                                                                                                                                                                                               | 49151    |
| 55 exp case-control studies/                                                                                                                                                                                                                                                                                                                                                                                                                                                                                                                                                                                                                                                                                                                                                                                                                                                                                                                                                                                                                                                                                                                                                                                                                                              | 1395687  |
| 56 exp confidence interval/                                                                                                                                                                                                                                                                                                                                                                                                                                                                                                                                                                                                                                                                                                                                                                                                                                                                                                                                                                                                                                                                                                                                                                                                                                               | 171961   |
| 57 exp regression analysis/                                                                                                                                                                                                                                                                                                                                                                                                                                                                                                                                                                                                                                                                                                                                                                                                                                                                                                                                                                                                                                                                                                                                                                                                                                               | 922316   |
| 58 exp multivariate analysis/                                                                                                                                                                                                                                                                                                                                                                                                                                                                                                                                                                                                                                                                                                                                                                                                                                                                                                                                                                                                                                                                                                                                                                                                                                             | 577413   |
| 59 odds ratio/                                                                                                                                                                                                                                                                                                                                                                                                                                                                                                                                                                                                                                                                                                                                                                                                                                                                                                                                                                                                                                                                                                                                                                                                                                                            | 116824   |
| ((meta adj analys*) or metaanalys* or (systematic* adj3 review*) or (control* adj3 study) or (control* adj3 trial) or (randomized adj3 study) or (randomized adj3 trial) or (randomised adj3 study) or (randomised adj3 trial) or "pragmatic clinical trial" or (random* adj1 allocat*) or (doubl* adj blind*) or (doubl* adj mask*) or (singl* adj blind*) or (singl* adj mask*) or (tripl* adj blind*) or (tripl* adj mask*) or (trebl* adj blind*) or (trebl* adj mask*) or "latin square" or placebo* or nocebo* or multivariate or "comparative study" or "comparative survey" or "comparative analysis" or (intervention* adj2 study) or (intervention* adj2 trial) or "cross-sectional study" or "cross-sectional analysis" or "cross-sectional survey" or "cross-sectional design" or "prevalence study" or "prevalence analysis" or "prevalence survey" or "disease frequency study" or "disease frequency analysis" or "disease frequency survey" or cohort* or "longitudinal study" or "longitudinal survey" or "longitudinal analysis" or "longitudinal evaluation" or longitudinal* or ((retrospective or "ex post facto") adj3 (study or survey or analysis or design)) or                                                                                  |          |
| 60 retrospectiv* or "prospective study" or "prospective survey" or "prospective analysis" or prospectiv* or ("follow-up" or followup) adj (stud* or survey or analysis) or ((observation or observational) adj (study or survey or analysis)) or "clinical study" or "clinical trial" or ("phase 0" or "phase 1" or "phase I" or "phase 2" or "phase II" or "phase 3" or "phase III" or "phase 4" or "phase IV") adj5 (trial or study) or "evaluation study" or "evaluation survey" or "evaluation analysis" or "quantitative study" or "quantitative analys*" or "numerical study" or "validation study" or "validation survey" or "validation analysis" or "pilot study" or "pilot survey" or "pilot analysis" or "pilot project" or ((correlation* adj2 study) or (correlation* adj2 analys*)) or "case control study" or "case base study" or "case referent study" or "case referent study" or "case referent study" or "case compeer study" or "case comparison study" or "matched case control" or "multicenter study" or "multi-center study" or "odds ratio" or "confidence interval" or "regression analysis" or "least square" or "least squares" or ((study or trial or random* or control*) and compar*) or "before and after" or "time motion" or "time and | 26503572 |

|                                                                                                                                                                                                                                                                                                                                                                                                                                                                                                                                                                                                                          |          |
|--------------------------------------------------------------------------------------------------------------------------------------------------------------------------------------------------------------------------------------------------------------------------------------------------------------------------------------------------------------------------------------------------------------------------------------------------------------------------------------------------------------------------------------------------------------------------------------------------------------------------|----------|
| motion" or (qualitative adj (study or survey or analysis))).mp,pt.                                                                                                                                                                                                                                                                                                                                                                                                                                                                                                                                                       |          |
| 61 or/25-60                                                                                                                                                                                                                                                                                                                                                                                                                                                                                                                                                                                                              | 27485645 |
| 62 24 and 61                                                                                                                                                                                                                                                                                                                                                                                                                                                                                                                                                                                                             | 7108     |
| limit 62 to (conference abstract or editorial or erratum or note or addresses or autobiography or bibliography or biography or blogs or comment or dictionary or directory or interactive tutorial or interview or lectures or legal cases or legislation or news or newspaper article or overall or patient education handout or periodical index or portraits or published erratum or video-audio media or webcasts) [Limit not valid in CCTR,CDSR,Embase,Ovid MEDLINE(R),Ovid MEDLINE(R) Daily Update,Ovid MEDLINE(R) PubMed not MEDLINE,Ovid MEDLINE(R) In-Process,Ovid MEDLINE(R) Publisher; records were retained] | 1549     |
| 63                                                                                                                                                                                                                                                                                                                                                                                                                                                                                                                                                                                                                       |          |
| 64 from 63 keep 1-7                                                                                                                                                                                                                                                                                                                                                                                                                                                                                                                                                                                                      | 7        |
| 65 (62 not 63) or 64                                                                                                                                                                                                                                                                                                                                                                                                                                                                                                                                                                                                     | 5566     |
| 66 remove duplicates from 65                                                                                                                                                                                                                                                                                                                                                                                                                                                                                                                                                                                             | 3709     |

Scopus

- 1 TITLE-ABS-KEY(("ambulatory visit" or "ambulatory visits" or appointment\* or consultation or consultations or encounter or encounters or "Office visit" or "office visits" or "outpatient visit" or "outpatient visits") W/5 (duration or interval\* or length or lengthen or lengths or longer or minutes or shorter\* or time or times))
- 2 TITLE-ABS-KEY(Allergist\* OR Anaesthesiologist\* OR Andrologist\* OR Anesthesiologist\* OR cardiologist\* OR clinician\* OR dermatologist\* OR doctor\* OR endocrinologist\* OR "family practice" OR feldsher\* OR gastroenterologist\* OR gastrologist\* OR "general practice" OR Geneticist\* OR geriatrician\* OR gerontologist\* OR Gynecologist\* OR Hematologist\* OR Hepatologist\* OR hospitalist\* OR Immunologist\* OR Internist\* OR "local health authority" OR nephrologist\* OR neurologist\* OR Neurophysiologist\* OR neurosurgeon\* OR obstetrician\* OR oncologist\* OR Ophthalmologist\* OR Orthopedist\* OR otolaryngologist\* OR physician\* OR Physiologist\* OR podiatrist\* OR practitioner\* OR "primary care" OR "primary health care" OR provider\* OR Psychiatrist\* OR Pulmonologist\* OR radiologist\* OR rheumatologist\* OR Specialist\* OR surgeon\* OR "surgical special\*" OR urologist\*)
- 3 TITLE-ABS-KEY(((patient or patients) W/3 (safety or error\* or "adverse event\*" or experience\* or enabl\*)) OR (patient\* W/3 satisf\*) OR (quality W/5 (care or healthcare)) OR confidence OR Disparit\* OR effectiveness OR efficiency OR equit\* OR inequit\* OR "patient-centeredness" OR safety OR timeliness OR trust OR value)
- 4 TITLE-ABS-KEY((meta W/1 analys\*) OR metaanalys\* OR (systematic\* W/3 review\*) OR (control\* W/3 study) OR (control\* W/3 trial) OR (randomized W/3 study) OR (randomized W/3 trial) OR (randomised W/3 study) OR (randomised W/3 trial) OR "pragmatic clinical trial" OR (random\* W/1 allocat\*) OR (doubl\* W/1 blind\*) OR (doubl\* W/1 mask\*) OR (singl\* W/1 blind\*) OR (singl\* W/1 mask\*) OR (tripl\* W/1 blind\*) OR (tripl\* W/1 mask\*) OR (trebl\* W/1 blind\*) OR (trebl\* W/1 mask\*) OR "latin square" OR placebo\* OR nocebo\* OR multivariate OR "comparative study" OR "comparative survey" OR "comparative analysis" OR (intervention\* W/2 study) OR (intervention\* W/2 trial) OR "cross-sectional study" OR "cross-sectional analysis" OR "cross-sectional survey" OR "cross-sectional design" OR "prevalence study" OR "prevalence analysis" OR "prevalence survey" OR "disease frequency study" OR "disease frequency analysis" OR "disease frequency survey" OR cohort\* OR "longitudinal study" OR "longitudinal survey" OR "longitudinal analysis" OR "longitudinal evaluation" OR longitudinal\* OR ((retrospective OR "ex post facto") W/3 (study OR survey OR analysis OR design)) OR retrospectiv\* OR "prospective study" OR "prospective survey" OR "prospective analysis" OR prospectiv\* OR (("follow-up" or followup) W/1 (stud\* or survey or analysis)) OR ((observation or observational) W/1 (study or survey or analysis)) OR "clinical study" OR "clinical trial" OR (("phase 0" or "phase 1" or "phase I" or "phase 2" or "phase II" or "phase 3" or "phase III" or "phase 4" or "phase IV") W/5 (trial or study)) OR "evaluation study" OR "evaluation survey" OR "evaluation analysis" OR "quantitative study" OR "quantitative analys\*" OR "numerical study" OR "validation study" OR "validation survey" OR "validation analysis" OR "pilot study" OR "pilot survey" OR "pilot analysis" OR "pilot project" OR ((correlation\* W/2 study) OR (correlation\* W/2 analys\*)) OR "case control study" OR "case base study" OR "case referent study" OR "case referent study" OR "case referent study" OR "case compeer study" OR "case comparison study" OR "matched case control" OR "multicenter study" OR "multi-center study" OR "odds ratio" OR "confidence interval" OR "regression analysis" OR "least square" OR "least squares" OR ((study OR trial OR random\* OR control\*) AND compar\*) OR "before after" or "before and after" or "time motion" or "time and motion" or (qualitative W/1 (study or survey or analysis)))
- 5 1 and 2 and 3 and 4

- 6 TITLE-ABS-KEY(newborn\* or neonat\* or infant\* or toddler\* or child\* or adolescent\* or paediatric\* or pediatric\* or girl or girls or boy or boys or teen or teens or teenager\* or preschooler\* or "pre-schooler\*" or preteen or preteens or "pre-teen" or "pre-teens" or youth or youths) AND NOT TITLE-ABS-KEY(adult or adults or "middle age" or "middle aged" OR elderly OR geriatric\* OR "old people" OR "old person\*" OR "older people" OR "older person\*" OR "very old")
- 7 5 and not 6
- 8 DOCTYPE(ab) OR DOCTYPE(ed) OR DOCTYPE(bk) OR DOCTYPE(er) OR DOCTYPE(no) OR DOCTYPE(sh)
- 9 7 and not 8
- 10 INDEX(embase) OR INDEX(medline) OR PMID(0\* OR 1\* OR 2\* OR 3\* OR 4\* OR 5\* OR 6\* OR 7\* OR 8\* OR 9\*)
- 11 9 and not 10
